# Supplementary material for: Rapid determination of emerging contaminants in water and herbal infusions by in situ derivatization and gas chromatography-tandem mass spectrometry
Source: Royal Society of Chemistry journal article supplement (doi:10.1039/c4ay03010a), 2015-01-01

## SUPPLEMENTARY INFORMATION

### **RAPID DETERMINATION OF EMERGING CONTAMINANTS IN WATER AND HERBAL INFUSIONS BY IN-SITU DERIVATIZATION AND GAS CHROMATOGRAPHY-TANDEM MASS SPECTROMETRY.**

Beatriz Albero, Consuelo Sánchez-Brunete, Esther Miguel, José L. Tadeo\*

*Departamento de Medio Ambiente, Instituto Nacional de Investigación y Tecnología Agraria  
y Alimentaria (INIA), Ctra. de La Coruña Km 7.5, 28040 Madrid, Spain.*

**Figure S1.** EI mass spectra of the derivatives of the target analytes after their derivatization with ethyl chloroformate

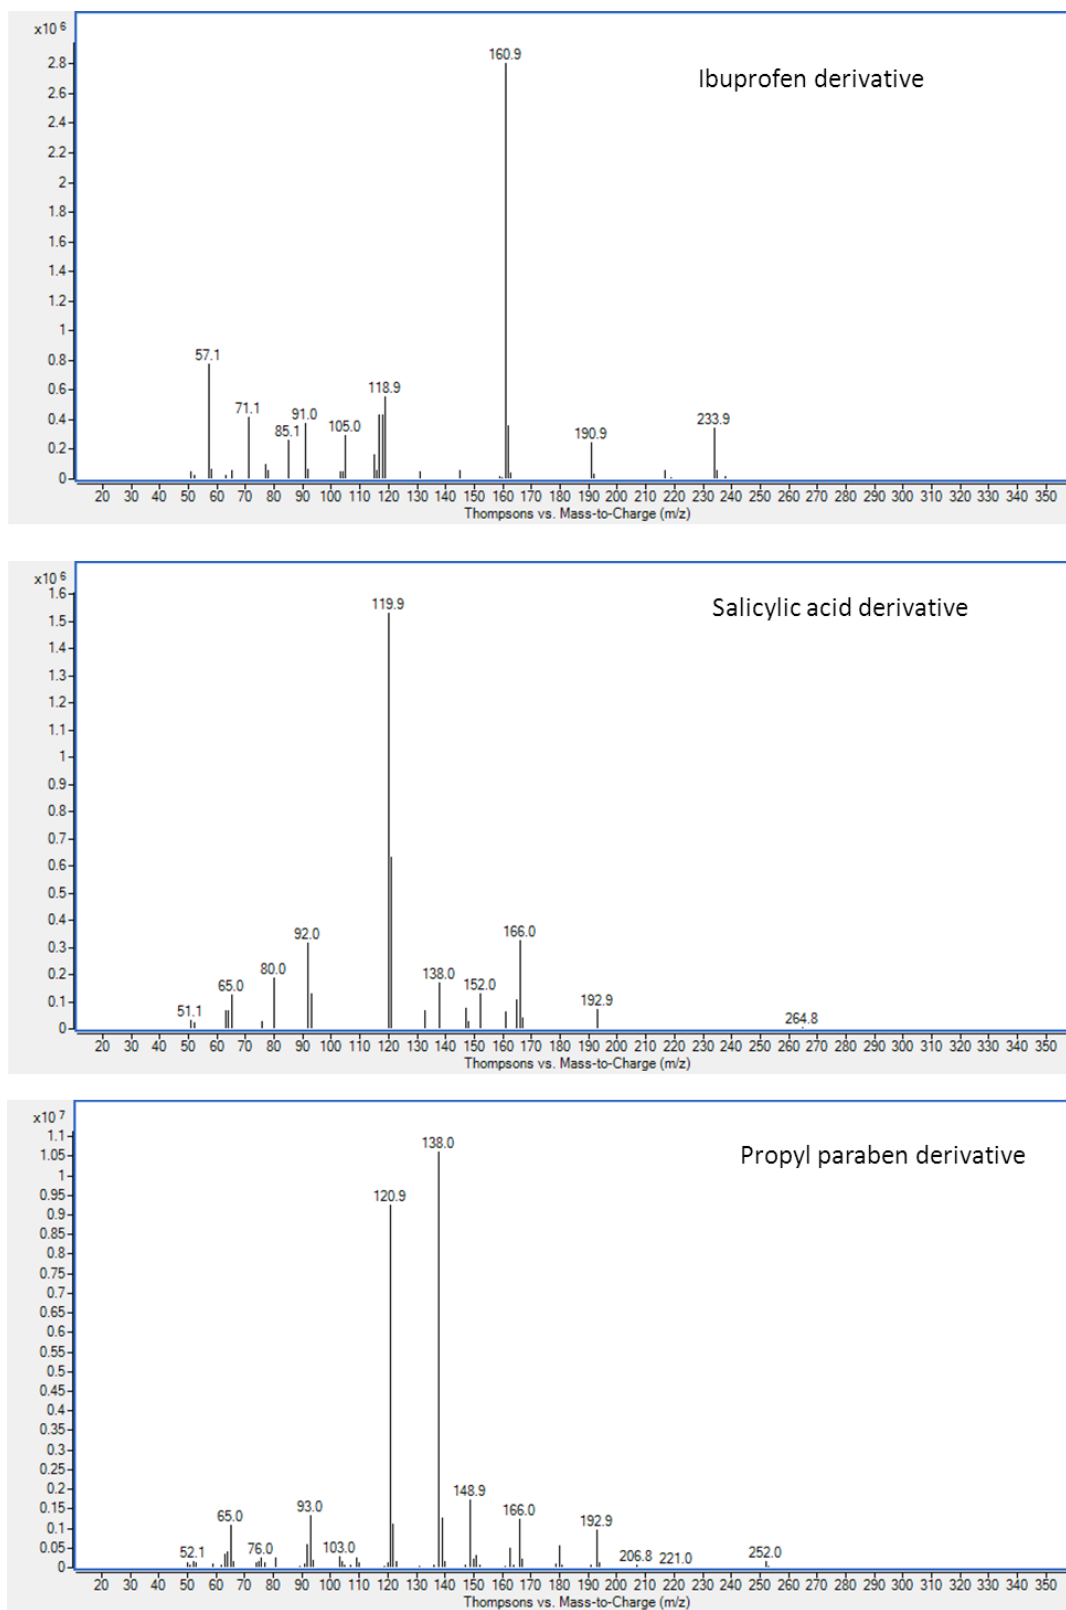

Fig S1 cont.

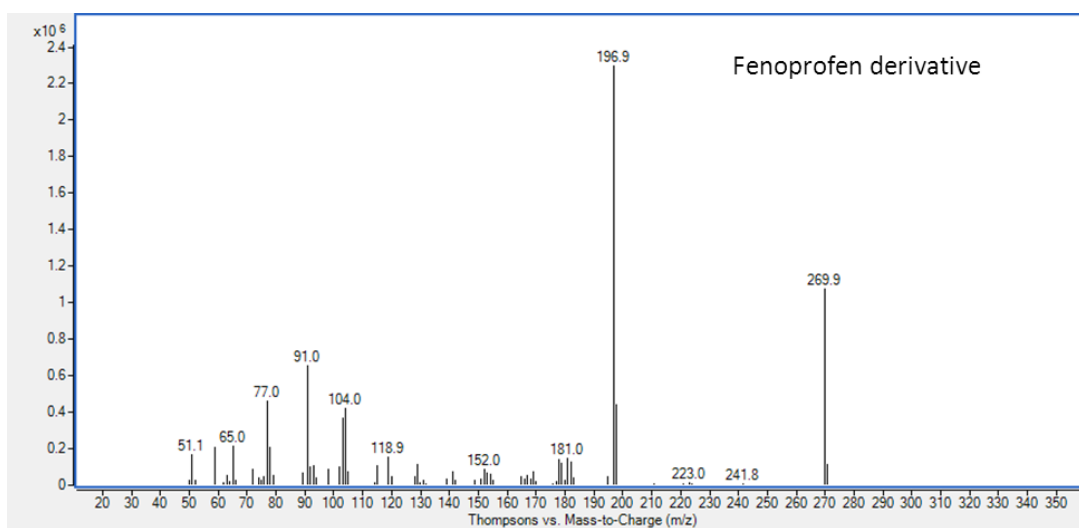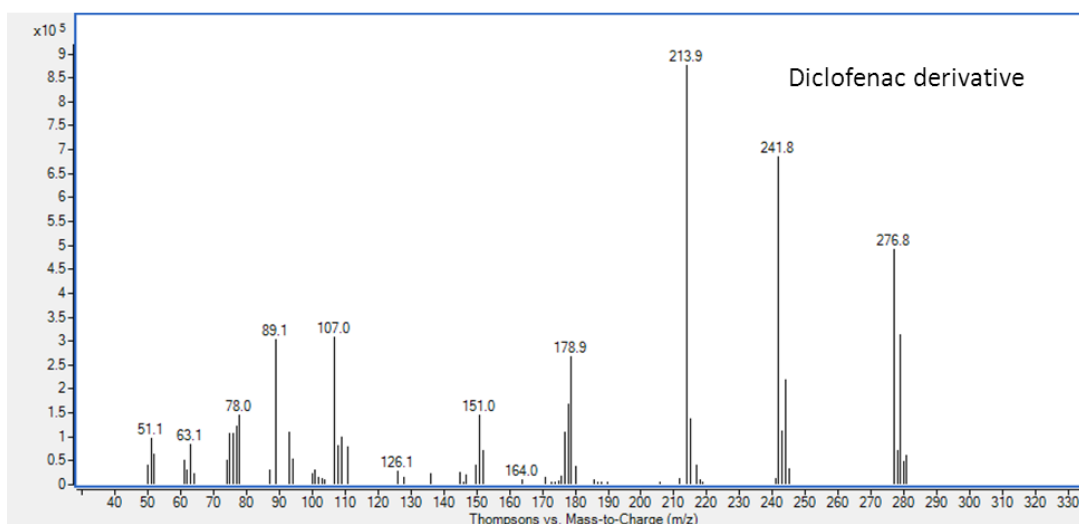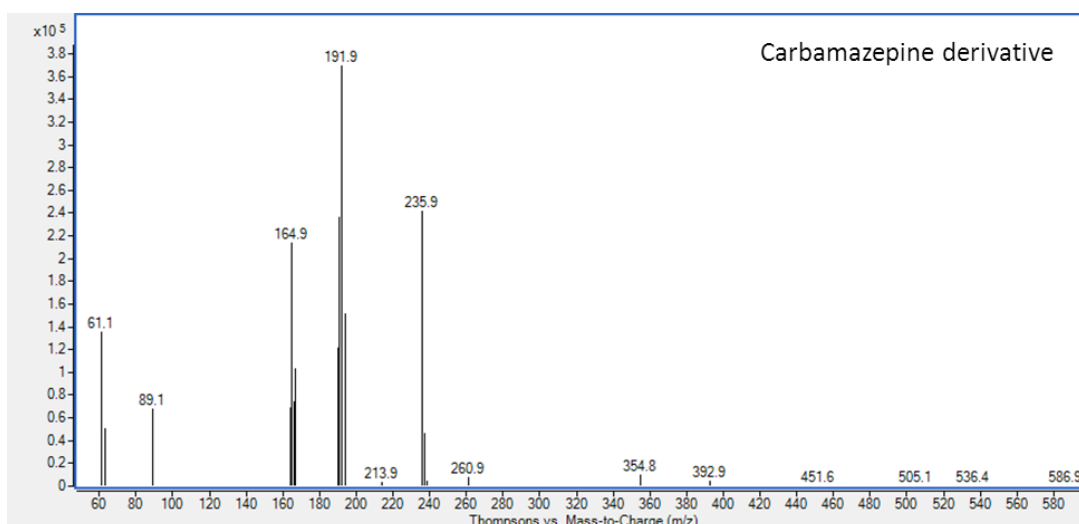

Fig S1 cont.

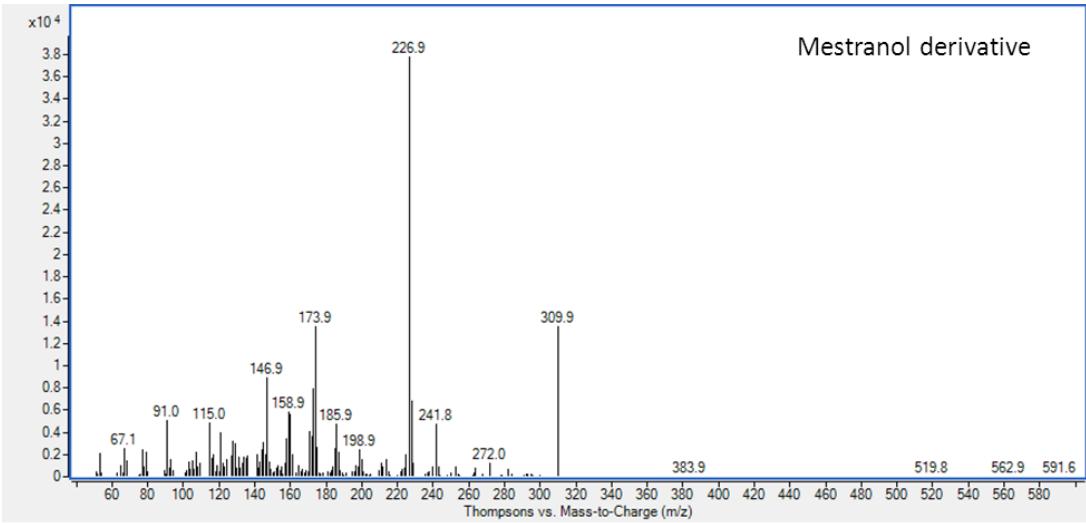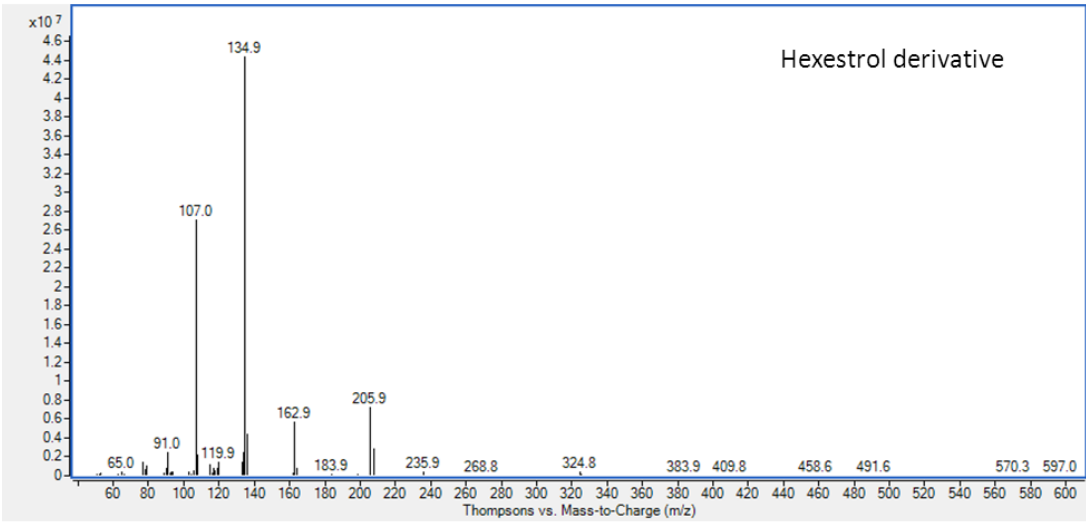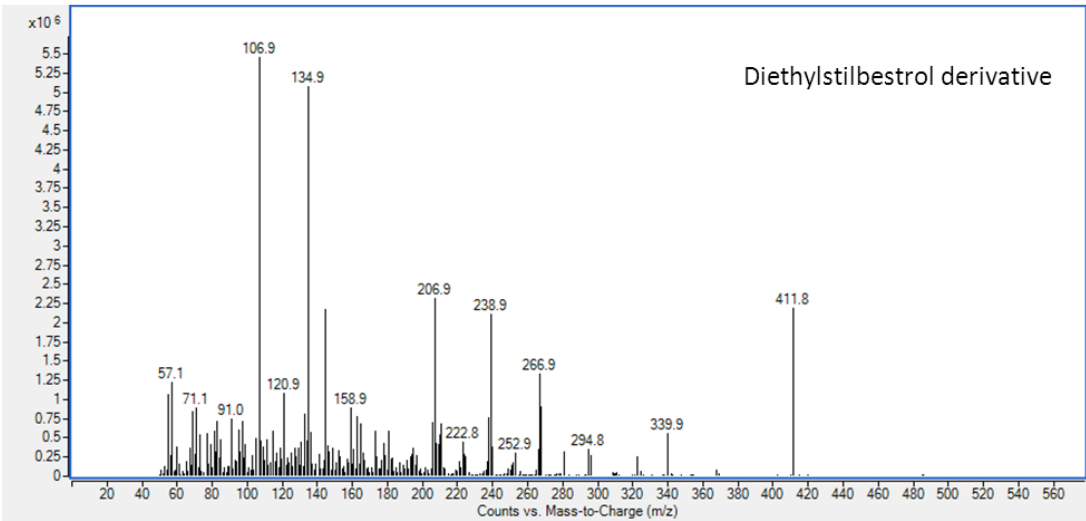

Fig S1 cont.

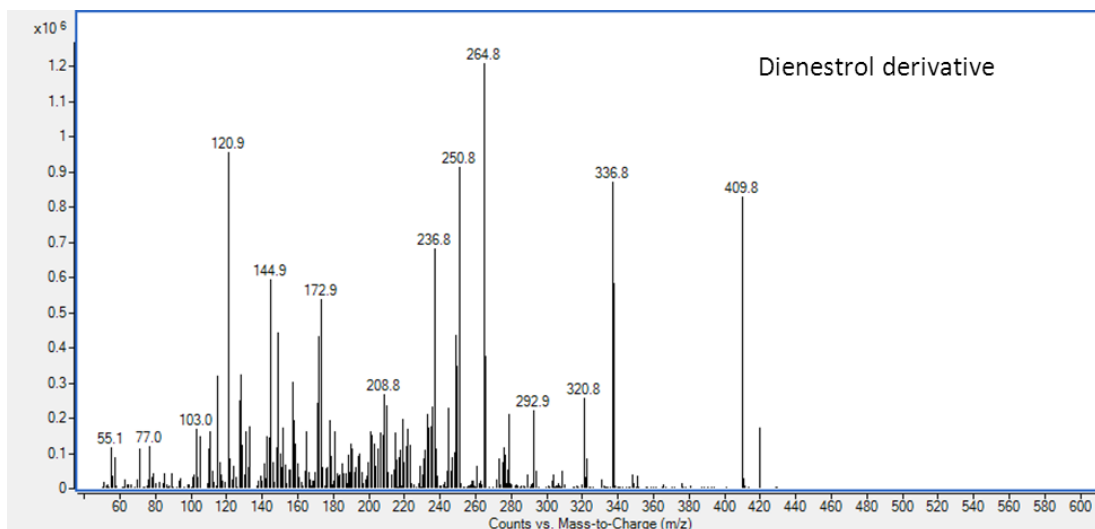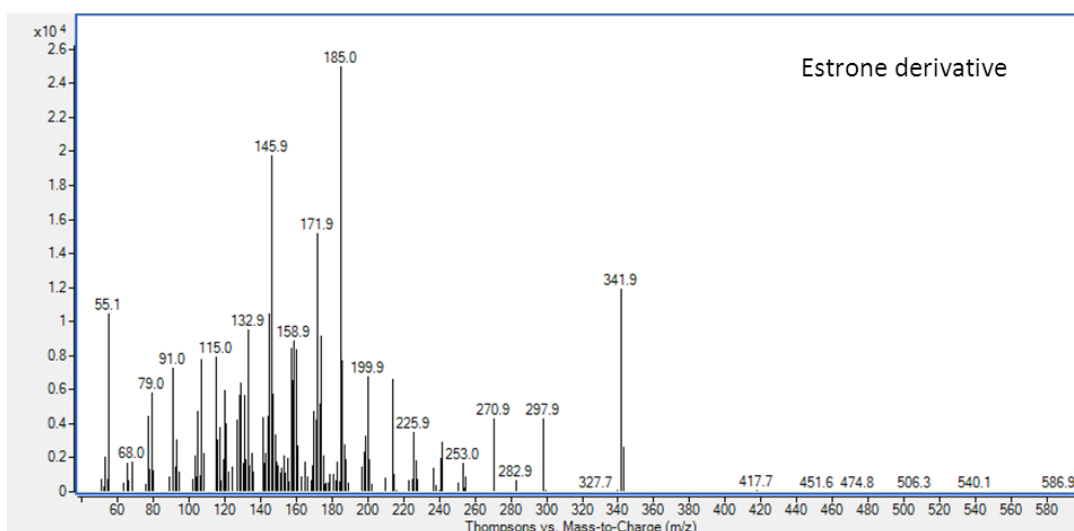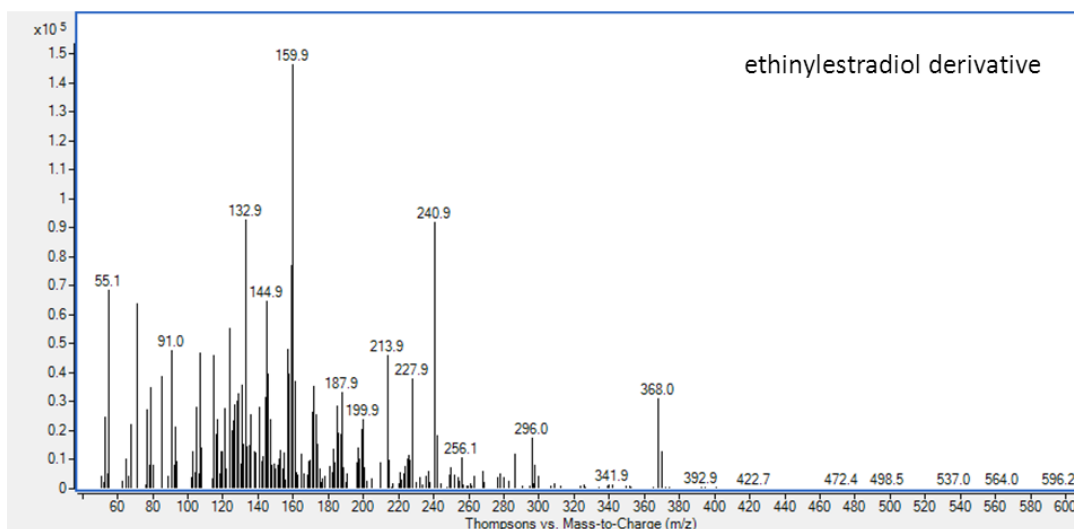

Supplement: c4ay03010a1.pdf [file c4ay03010a1.pdf]
